# Supplementary material
Source: publisher site journal article supplement (https://www.dovepress.com/article/335183)

Supplemental Figure 1: Log plot evaluating the relationship between neutrophil to lymphocyte ratio (NLR) (A), platelet to lymphocyte ratio (PLR) (B), aspartate aminotransferase to lymphocyte ratio (ALRI) (C) and systemic-inflammation index (SII) (D) and alpha fetoprotein (AFP).

Supplemental Figure 1a


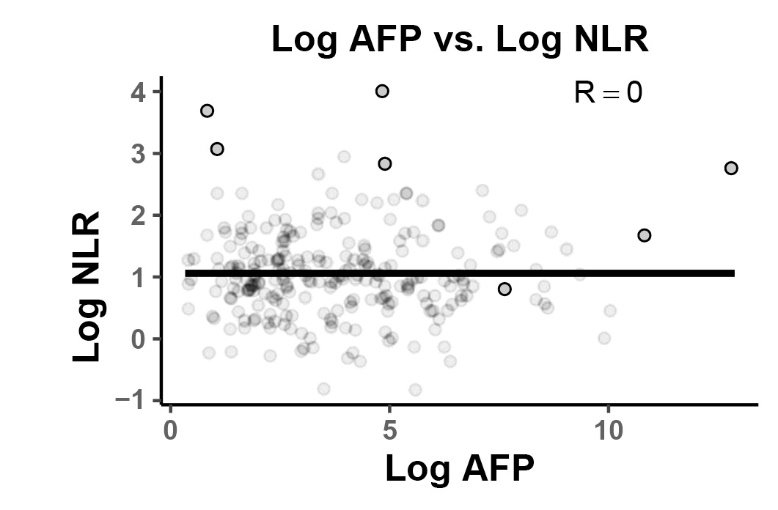


Supplemental Figure 1b


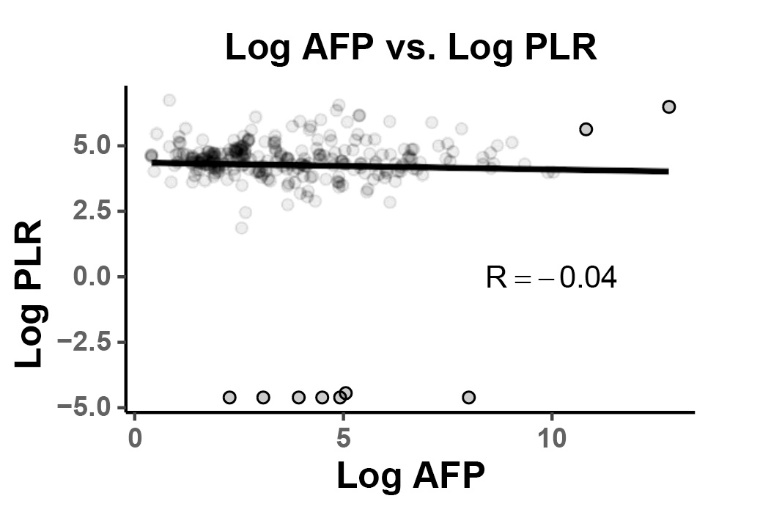


Supplemental Figure 1c


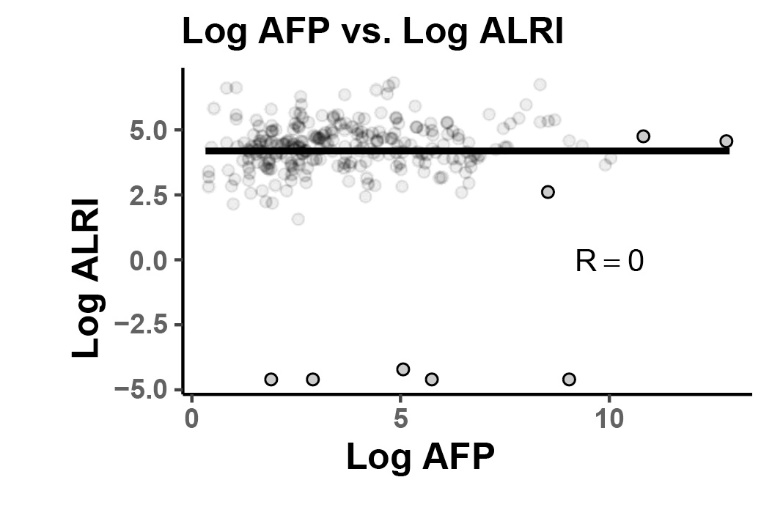


Supplemental Figure 1d


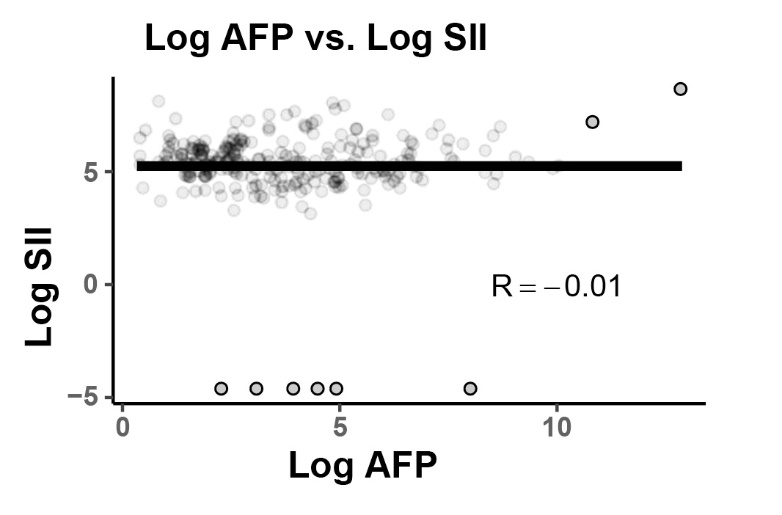


Supplemental Figure 2: Log plot evaluating the relationship between neutrophil to lymphocyte ratio (NLR) (A), platelet to lymphocyte ratio (PLR) (B), aspartate aminotransferase to lymphocyte ratio (ALRI) (C) and systemic-inflammation index (SII) (D) and tumor size.

Supplemental Figure 2a


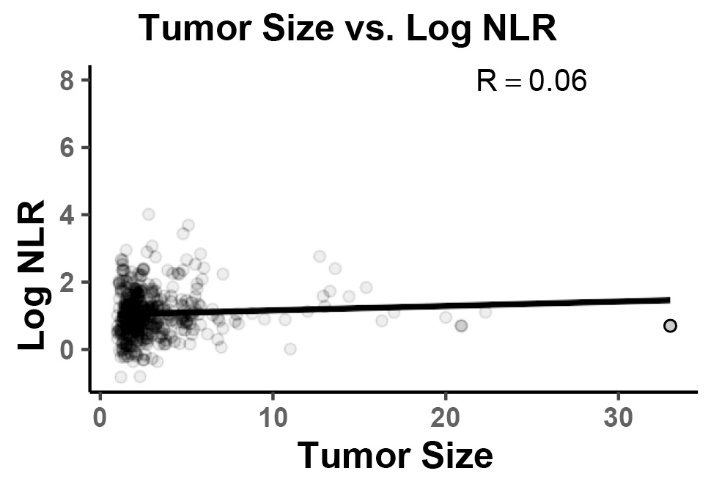


Supplemental Figure 2b


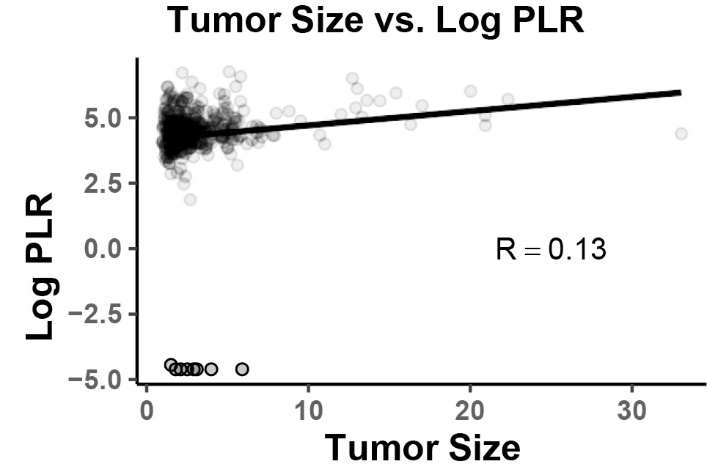


Supplemental Figure 2c


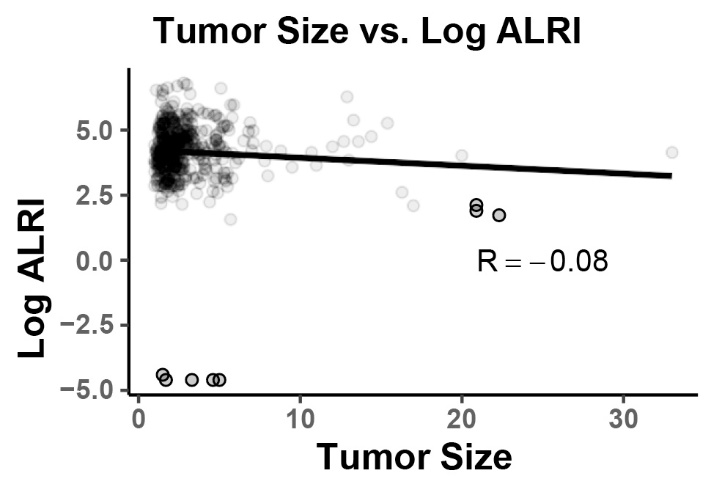


Supplemental Figure 2d


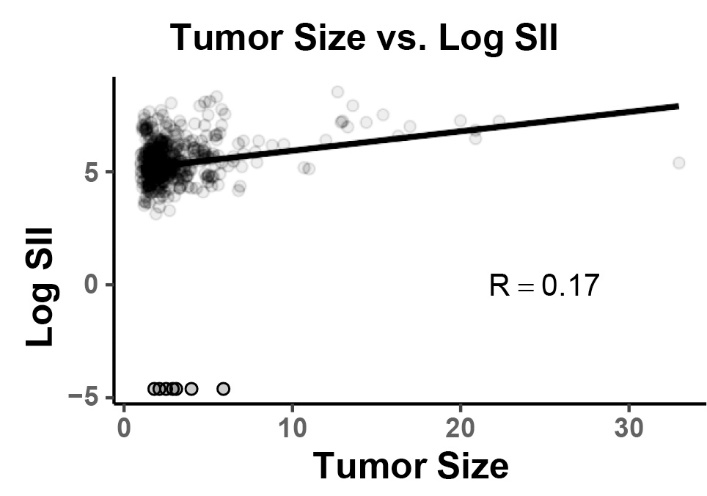


Supplemental Figure 3: Box and whisker diagram evaluating the relationship between neutrophil to lymphocyte ratio (NLR) (A), platelet to lymphocyte ratio (PLR) (B), aspartate aminotransferase to lymphocyte ratio (ALRI) (C) and systemic-inflammation index (SII) (D) and cause of cirrhosis.

Supplemental Figure 3a


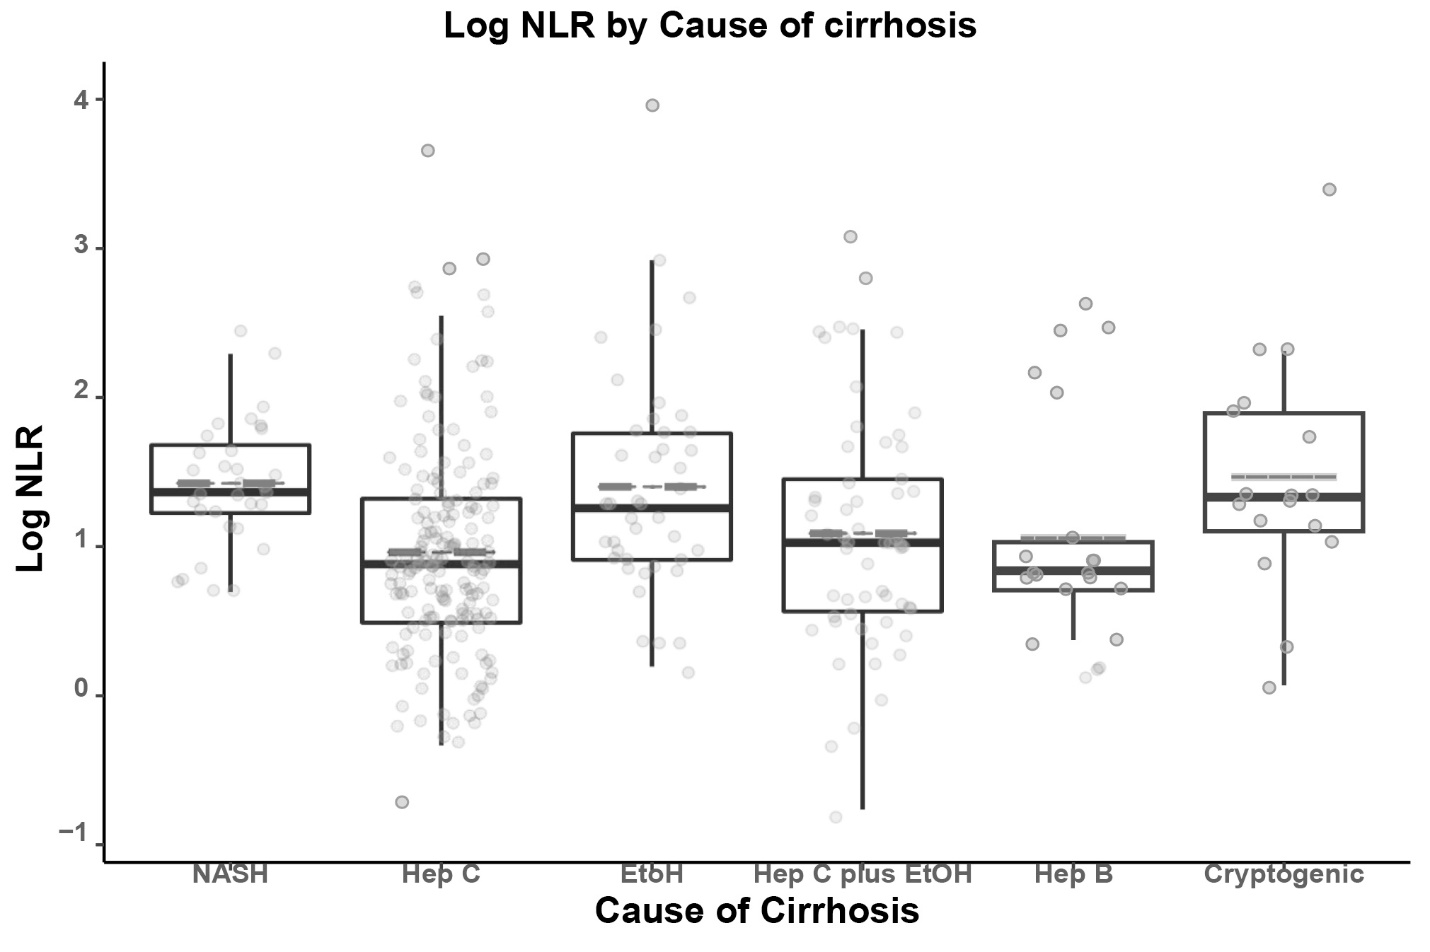


Supplemental Figure 3b


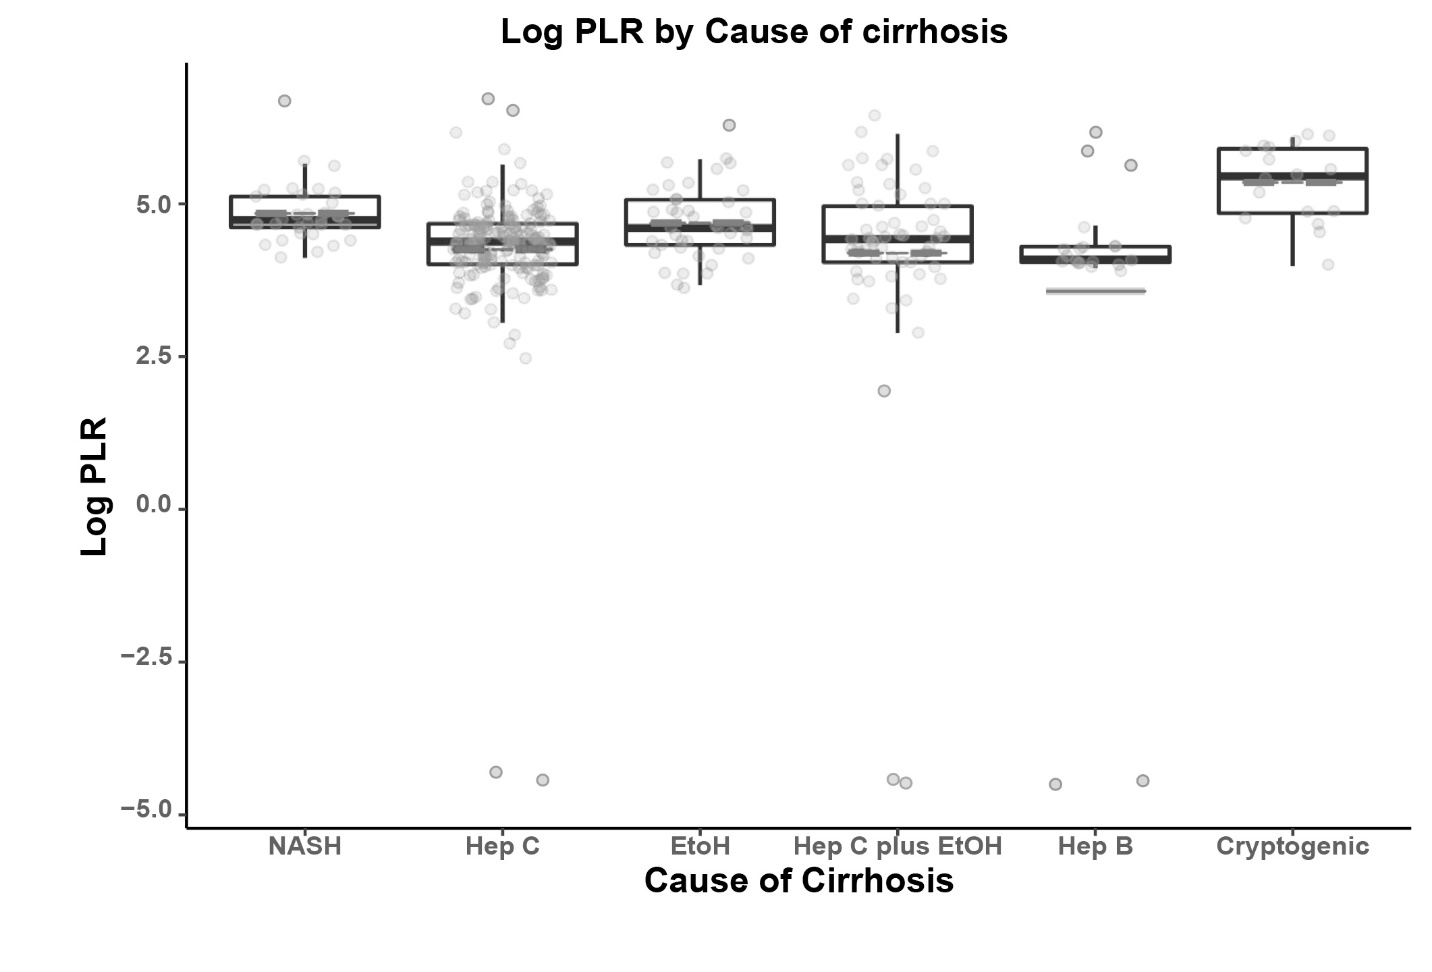


Supplemental Figure 3c


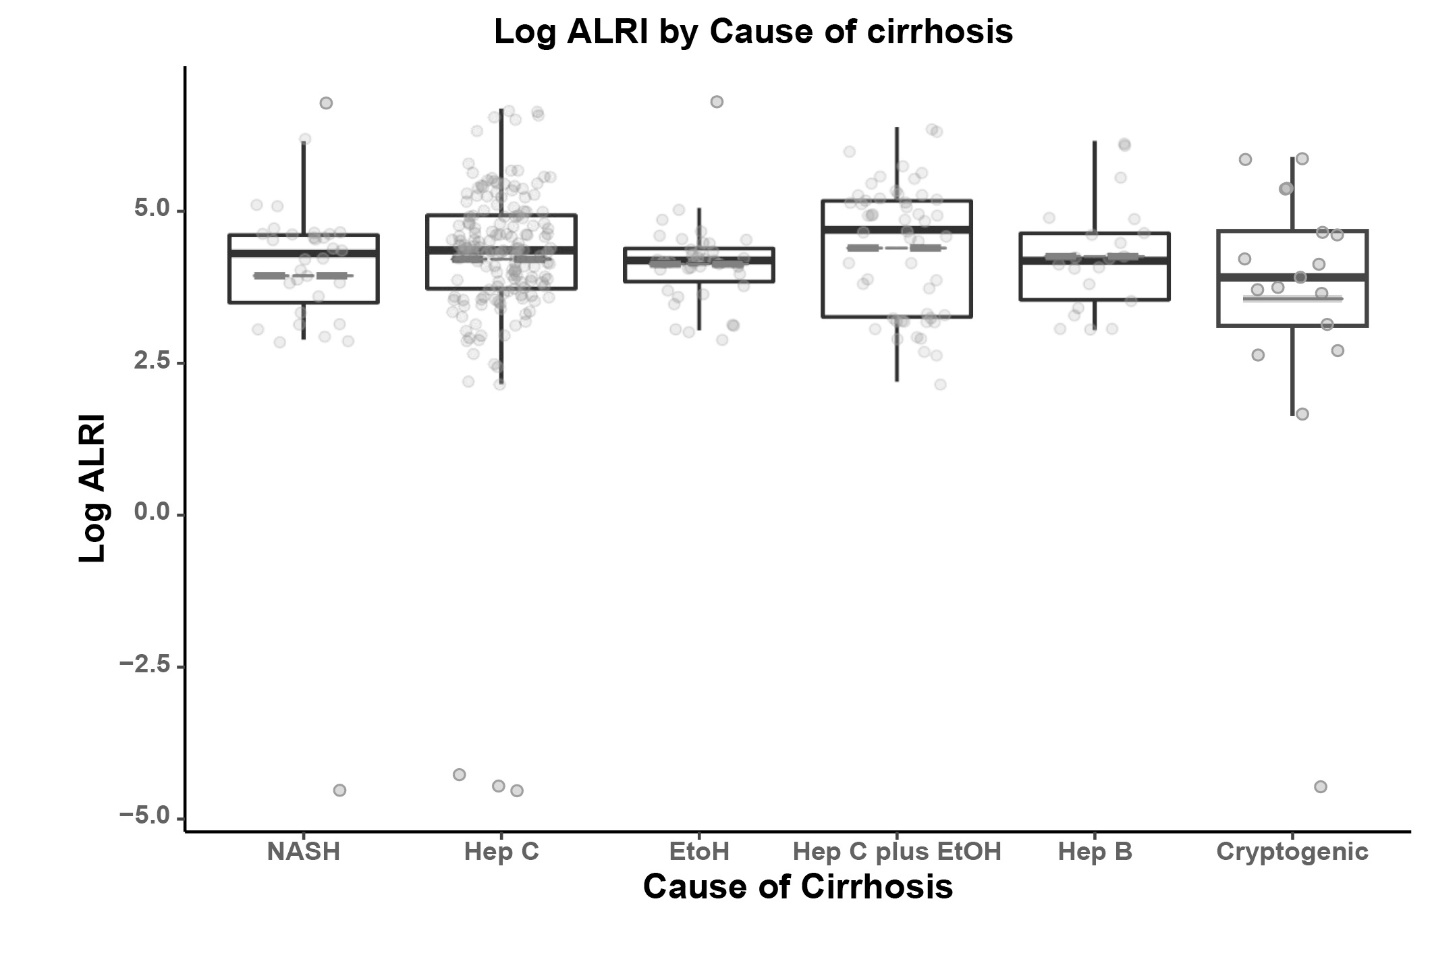


Supplemental Figure 3d


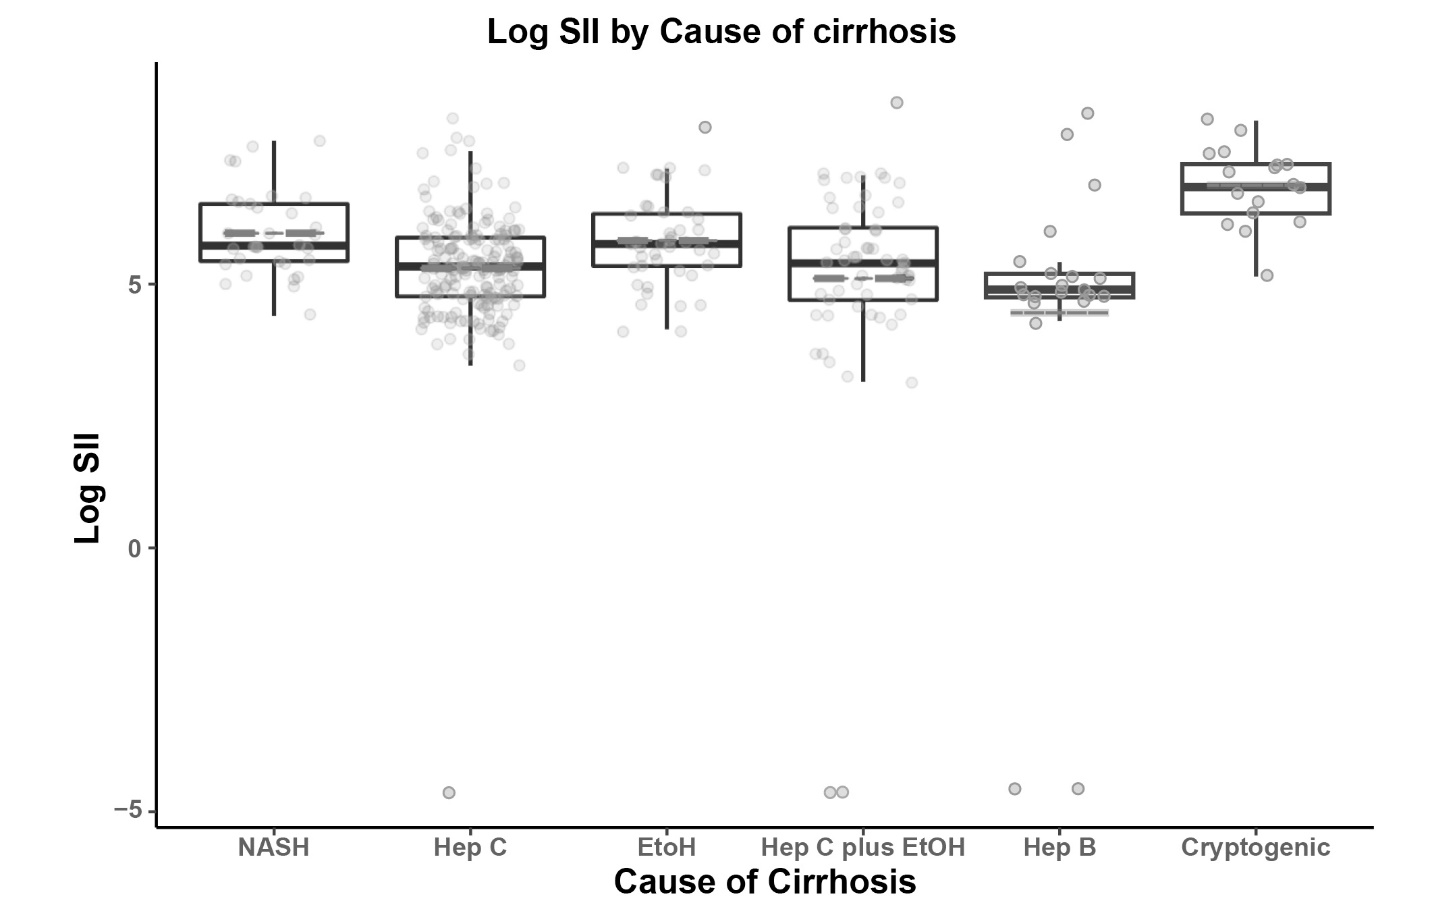

Supplement: Supplementary file 1 [file get_supplementary_file.php]
